# Supplementary material for: Attitude Towards and Adoption of the Novel Learning Environment Among Undergraduate Medical Students During COVID-19
Source: Frontiers journal article supplement (doi:10.3389/feduc.2021.714526), 2021-10-26
Supplement: Data_Sheet_1.PDF [file Data_Sheet_1.PDF]

## Supplementary Tables Study 1

**Supplementary Table 1. Descriptive statistics and Kruskal-Wallis comparisons of cohorts (study 1).**

| Perceptions of digital teaching                                                        | Year 1 students |             |     | Year 2 students |             |     | Year 3 students |             |     | Year 4 students |             |     |          |          |          |
|----------------------------------------------------------------------------------------|-----------------|-------------|-----|-----------------|-------------|-----|-----------------|-------------|-----|-----------------|-------------|-----|----------|----------|----------|
|                                                                                        | N               | M (SD)      | Mdn | <i>H</i> | <i>p</i> | $\eta^2$ |
| The digital classes left more questions unanswered for me than usual teaching.         | 301             | 3.87 (1.67) | 4   | 404             | 3.92 (1.70) | 4   | 318             | 4.11 (1.64) | 4   | 326             | 3.42 (1.73) | 4   | 26.35    | .000     | .017     |
| I was shy of asking questions in video conferences.                                    | 243             | 3.42 (1.71) | 3   | 351             | 3.49 (1.69) | 4   | 228             | 4.00 (1.67) | 4.5 | 296             | 3.48 (1.72) | 4   | 18.78    | .000     | .014     |
| I felt overstrained by the lack of a time frame and structure in the digital teaching. | 298             | 3.44 (1.79) | 4   | 403             | 3.38 (1.80) | 4   | 321             | 3.78 (1.77) | 4   | 331             | 3.16 (1.72) | 3   | 19.82    | .000     | .012     |
| I appreciate the use of digital teaching offers independently of time and location.    | 296             | 4.90 (1.36) | 5   | 401             | 4.88 (1.32) | 5   | 317             | 4.90 (1.29) | 5   | 320             | 5.06 (1.18) | 5   | 3.12     | .373     | 0        |
| I appreciate the possibility to use digital teaching material repeatedly.              | 299             | 5.48 (.92)  | 6   | 409             | 5.50 (.93)  | 6   | 321             | 5.52 (.90)  | 6   | 328             | 5.57 (.90)  | 6   | 1.55     | .672     | .001     |
| The use of digital teaching offers increases my study satisfaction.                    | 300             | 4.10 (1.63) | 4   | 405             | 4.25 (1.64) | 5   | 317             | 3.95 (1.59) | 4   | 327             | 4.40 (1.47) | 5   | 14.40    | .002     | .008     |
| The digital teaching format motivated me to continuously pursue autonomous learning.   | 301             | 3.84 (1.68) | 4   | 409             | 3.93 (1.71) | 4   | 318             | 3.46 (1.62) | 4   | 328             | 4.24 (1.54) | 5   | 37.23    | .000     | .025     |
| I managed the autonomous acquisition of the study topics well.                         | 299             | 4.52 (1.38) | 5   | 409             | 4.64 (1.25) | 5   | 322             | 4.21 (1.36) | 4   | 332             | 4.82 (1.09) | 5   | 38.00    | .000     | .026     |

**Supplementary Table 2. Descriptive statistics and Mann-Whitney comparisons of male and female students (study 1).**

| Perceptions of digital teaching                                                        | Whole Sample |             |     | Female Students |             |     | Male Students |             |     | <i>U</i> | <i>p</i> | <i>r</i> |
|----------------------------------------------------------------------------------------|--------------|-------------|-----|-----------------|-------------|-----|---------------|-------------|-----|----------|----------|----------|
|                                                                                        | N            | M (SD)      | Mdn | N               | M (SD)      | Mdn | N             | M (SD)      | Mdn |          |          |          |
| The digital classes left more questions unanswered for me than usual teaching.         | 1349         | 3.81 (1.70) | 4   | 807             | 3.78 (1.72) | 4   | 508           | 3.87 (1.67) | 4   | 198485.5 | .325     | .03      |
| I was shy of asking questions in video conferences.                                    | 1118         | 3.58 (1.71) | 4   | 675             | 3.65 (1.71) | 4   | 411           | 3.46 (1.69) | 4   | 129935   | .075     | .05      |
| I felt overstrained by the lack of a time frame and structure in the digital teaching. | 1353         | 3.43 (1.78) | 4   | 810             | 3.25 (1.81) | 3   | 508           | 3.73 (1.71) | 4   | 174866   | .000     | .13      |
| I appreciate the use of digital teaching offers independently of time and location.    | 1334         | 4.93 (1.29) | 5   | 797             | 5.00 (1.22) | 5   | 503           | 4.83 (1.37) | 5   | 187683   | .040     | .06      |
| I appreciate the possibility to use digital teaching material repeatedly.              | 1357         | 5.52 (.90)  | 6   | 808             | 5.58 (.80)  | 6   | 514           | 5.45 (.99)  | 6   | 194434   | .015     | .07      |
| The use of digital teaching offers increases my study satisfaction.                    | 1349         | 4.18 (1.60) | 4   | 802             | 4.30 (1.54) | 5   | 512           | 3.99 (1.66) | 4   | 184617   | .002     | .09      |
| The digital teaching format motivated me to continuously pursue autonomous learning.   | 1356         | 3.88 (1.66) | 4   | 806             | 4.01 (1.62) | 4   | 515           | 3.67 (1.69) | 4   | 183269.5 | .000     | .10      |
| I managed the autonomous acquisition of the study topics well.                         | 1362         | 4.55 (1.29) | 5   | 810             | 4.62 (1.24) | 5   | 517           | 4.46 (1.34) | 5   | 195946.5 | .041     | .06      |

**Supplementary Table 3. Descriptive statistics and Kruskal-Wallis comparisons of age groups (study 1).**

| Perceptions of digital teaching                                                        | Younger than 21 years |             |     | 21-25 years |             |     | 26-30 years |             |     | Older than 30 years |             |     |          |          |          |
|----------------------------------------------------------------------------------------|-----------------------|-------------|-----|-------------|-------------|-----|-------------|-------------|-----|---------------------|-------------|-----|----------|----------|----------|
|                                                                                        | N                     | M (SD)      | Mdn | N           | M (SD)      | Mdn | N           | M (SD)      | Mdn | N                   | M (SD)      | Mdn | <i>H</i> | <i>p</i> | $\eta^2$ |
| The digital classes left more questions unanswered for me than usual teaching.         | 212                   | 3.55 (1.69) | 4   | 758         | 3.98 (1.67) | 4   | 255         | 3.69 (1.71) | 4   | 123                 | 3.38 (1.74) | 4   | 21.55    | .000     | .014     |
| I was shy of asking questions in video conferences.                                    | 172                   | 3.67 (1.69) | 4   | 623         | 3.66 (1.71) | 4   | 215         | 3.36 (1.72) | 4   | 107                 | 3.36 (1.70) | 4   | 7.25     | .064     | .004     |
| I felt overstrained by the lack of a time frame and structure in the digital teaching. | 214                   | 3.34 (1.75) | 4   | 762         | 3.54 (1.77) | 4   | 253         | 3.31 (1.74) | 3   | 123                 | 3.20 (1.95) | 3   | 6.48     | .091     | .003     |
| I appreciate the use of digital teaching offers independently of time and location.    | 213                   | 4.97 (1.26) | 5   | 748         | 4.85 (1.30) | 5   | 253         | 5.10 (1.24) | 6   | 119                 | 5.03 (1.36) | 6   | 11.96    | .008     | .007     |
| I appreciate the possibility to use digital teaching material repeatedly.              | 214                   | 5.53 (.84)  | 6   | 763         | 5.47 (.92)  | 6   | 256         | 5.63 (.84)  | 6   | 123                 | 5.58 (.92)  | 6   | 11.40    | .010     | .006     |
| The use of digital teaching offers increases my study satisfaction.                    | 213                   | 4.00 (1.55) | 4   | 760         | 4.07 (1.62) | 4   | 253         | 4.40 (1.52) | 5   | 122                 | 4.75 (1.52) | 5   | 30.26    | .000     | .02      |
| The digital teaching format motivated me to continuously pursue autonomous learning.   | 213                   | 3.93 (1.57) | 4   | 764         | 3.76 (1.69) | 4   | 256         | 4.05 (1.60) | 4   | 122                 | 4.15 (1.75) | 4   | 10.45    | .015     | .006     |
| I managed the autonomous acquisition of the study topics well.                         | 216                   | 4.66 (1.17) | 5   | 766         | 4.49 (1.32) | 5   | 257         | 4.59 (1.26) | 5   | 122                 | 4.67 (1.36) | 5   | 4.31     | .230     | .001     |
